# Supplementary material for: Cis and trans-bis(tetrathiafulvalene-acetylide) platinum(ii) complexes: syntheses, crystal structures, and influence of the ancillary ligands on their electronic properties
Source: Royal Society of Chemistry journal article supplement (doi:10.1039/c2dt31686b), 2012-09-24
Supplement: c2dt31686b.pdf [file c2dt31686b.pdf]

## **Supporting Information**

**for**

### ***Cis* and *Trans*-bis(Tetrathiafulvalene-Acetylide) Platinum(II) Complexes : Syntheses, Crystal Structures, and Influence of the Ancillary Ligands on their Electronic Properties**

Antoine Vacher, Frédéric Barrière, Franck Camerel,\* Jean-François Bergamini, Thierry Roisnel and Dominique Lorcy\*

Institut des Sciences Chimiques de Rennes, UMR 6226 CNRS-Université de Rennes 1, Campus de Beaulieu, Bâtiment 10A, 35042 Rennes, France. E-mail: [franck.camerel@univ-rennes1.fr](mailto:franck.camerel@univ-rennes1.fr), [dominique.lorcy@univ-rennes1.fr](mailto:dominique.lorcy@univ-rennes1.fr)

### **Contents**

|                                                                                                                                                                    |        |
|--------------------------------------------------------------------------------------------------------------------------------------------------------------------|--------|
| <b>ORTEP drawings of complexes 2 and 3</b>                                                                                                                         | page 2 |
| <b>UV-vis absorption spectra</b>                                                                                                                                   | page 3 |
| <b>Computational Details</b>                                                                                                                                       | page 4 |
| <b>The LanL2DZ basis set</b>                                                                                                                                       | page 5 |
| <b><u>Input Files, Cartesian Coordinates of Optimized Geometry, And Selection of Distances and Angles in the Optimized Geometry for 2, 2+, 3, 3+, 4 and 4+</u></b> | page 8 |

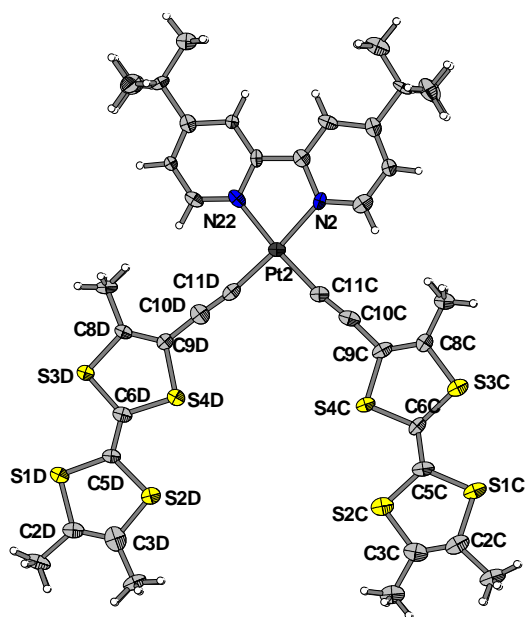

**Fig. S1** ORTEP drawing of the second crystallographically independent molecule of complex **2** with the main numbering scheme. Thermal ellipsoids drawn at the 50 % probability level.

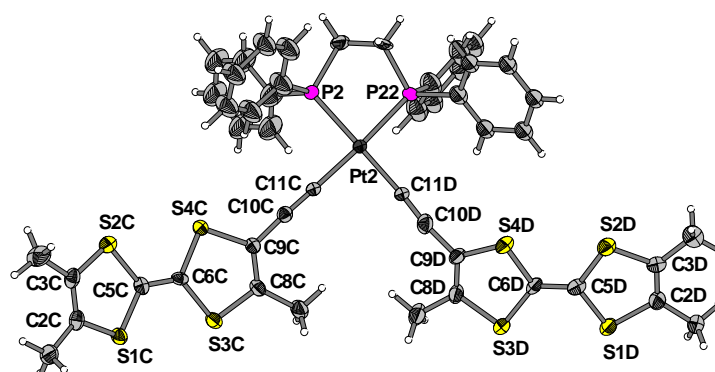

**Fig. S2** ORTEP drawing of the second crystallographically independent molecule of complex **3** with the main numbering scheme. Thermal ellipsoids drawn at the 50 % probability level.

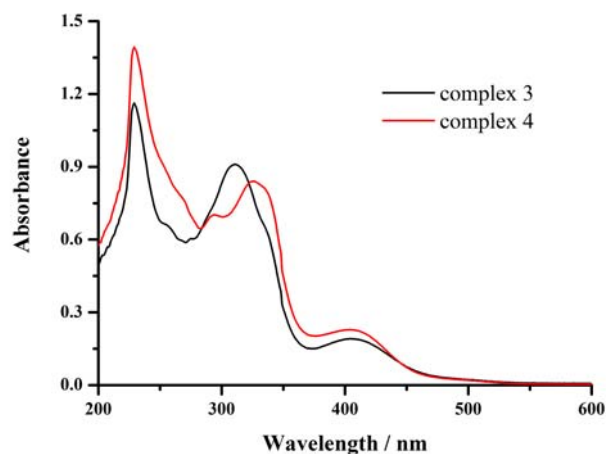

**Fig. S3** UV-vis absorption spectra of complexes **3** and **4** in dichloromethane at room temperature, ( $c \sim 10^{-5} \text{ mol.L}^{-1}$ ).

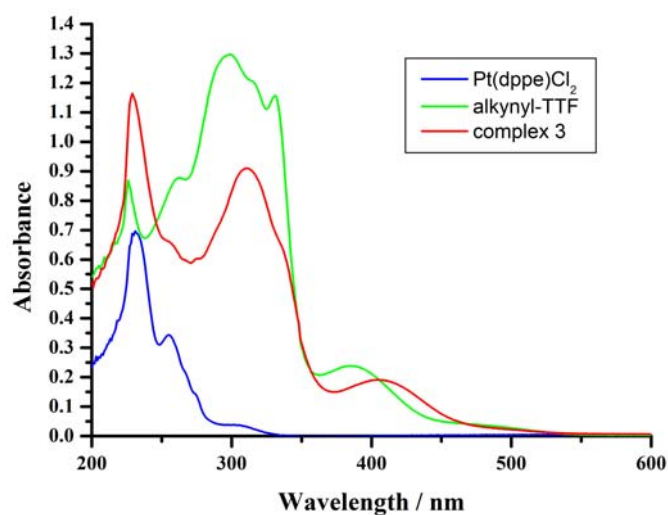

**Fig. S4** UV-visible absorption spectra of complex **3**, the alkynyl-TTF precursor and the Pt(dppe)Cl<sub>2</sub> precursor in dichloromethane at room temperature, ( $c \sim 10^{-5} \text{ mol.L}^{-1}$ ).

### **Computational Details**

DFT calculations (spin unrestricted for all open shell systems) were performed on gas phase molecules using the Gaussian 03, Revision D.02 program package, the B3LYP functional and the LanL2DZ basis set. The latter employs the Dunning/Huzinaga valence double zeta D95V[1] basis set for first row atoms and the Los Alamos Effective Core Potential plus DZ on atoms from Na-Bi.[2–4]

- 1 T. H. Dunning Jr and P. J. Hay, Modern Theoretical Chemistry, Plenum, New York, 1976.
- 2 P. J. Hay and W. R. Wadt, J. Chem. Phys., 1985, 82, 270.
- 3 W. R. Wadt and P. J. Hay, J. Chem. Phys., 1985, 82, 284.
- 4 P. J. Hay and W. R. Wadt, J. Chem. Phys., 1985, 82, 299.

Full parameters for common bases sets are available at <https://bse.pnl.gov/bse/portal>  
Parameters for the LanL2DZ basis set are reproduced next.

## LanL2DZ basis set

-----  
When publishing results obtained from use of the Basis Set Exchange (BSE) software and the EMSL Basis Set Library, please cite:

### The Role of Databases in Support of Computational Chemistry Calculations

Feller, D., J. Comp. Chem., 17(13), 1571-1586, 1996.

### Basis Set Exchange: A Community Database for Computational Sciences

Schuchardt, K.L., Didier, B.T., Elsethagen, T., Sun, L., Gurumoorthi, V., Chase, J., Li, J., and Windus, T.L.  
J. Chem. Inf. Model., 47(3), 1045-1052, 2007, doi:10.1021/ci600510j.

```
! LANL2DZ ECP EMSL Basis Set Exchange Library 4/26/11 8:55 AM
! Elements References
! -----
! H - Ne: T. H. Dunning Jr. and P. J. Hay, in Methods of Electronic Structure
! Theory, Vol. 2, H. F. Schaefer III, ed., PLENUM PRESS (1977)
! Na - Hg: P. J. Hay and W. R. Wadt, J. Chem. Phys. 82, 270 (1985).
! P. J. Hay and W. R. Wadt, J. Chem. Phys. 82, 284 (1985).
! P. J. Hay and W. R. Wadt, J. Chem. Phys. 82, 299 (1985).
!
****
H 0
S 3 1.00
    19.2384000 0.0328280
    2.8987000 0.2312040
    0.6535000 0.8172260
S 1 1.00
    0.1776000 1.0000000
****
C 0
S 7 1.00
    4233.0000000 0.0012200
    634.9000000 0.0093420
    146.1000000 0.0454520
    42.5000000 0.1546570
    14.1900000 0.3588660
    5.1480000 0.4386320
    1.9670000 0.1459180
S 2 1.00
    5.1480000 -0.1683670
    0.4962000 1.0600910
S 1 1.00
    0.1533000 1.0000000
P 4 1.00
    18.1600000 0.0185390
    3.9860000 0.1154360
    1.1430000 0.3861880
    0.3594000 0.6401140
P 1 1.00
    0.1146000 1.0000000
****
P 0
S 2 1.00
    1.5160000 -0.5862089
    0.3369000 1.2994376
S 1 1.00
    0.1211000 1.0000000
P 2 1.00
    3.7050000 -0.0691472
    0.3934000 1.0161988
P 1 1.00
    0.1190000 1.0000000
****
S 0
S 2 1.00
    1.8500000 -0.5324335
    0.4035000 1.2763801
S 1 1.00
    0.1438000 1.0000000
P 2 1.00
    4.9450000 -0.0608116
    0.4870000 1.0132686
P 1 1.00
    0.1379000 1.0000000
****
Ru 0
S 3 1.00
    2.5650000 -1.0431056
    1.5080000 1.3314786
```

|   |   |           |            |
|---|---|-----------|------------|
|   |   | 0.5129000 | 0.5613065  |
| S | 4 | 1.00      |            |
|   |   | 2.5650000 | 0.8770128  |
|   |   | 1.5080000 | -1.2634660 |
|   |   | 0.5129000 | -0.8384987 |
|   |   | 0.1362000 | 1.0637773  |
| S | 1 | 1.00      |            |
|   |   | 0.0417000 | 1.0000000  |
| P | 3 | 1.00      |            |
|   |   | 4.8590000 | -0.0945755 |
|   |   | 1.2190000 | 0.7434798  |
|   |   | 0.4413000 | 0.3668144  |
| P | 2 | 1.00      |            |
|   |   | 0.5725000 | -0.0880864 |
|   |   | 0.0830000 | 1.0283970  |
| P | 1 | 1.00      |            |
|   |   | 0.0250000 | 1.0000000  |
| D | 3 | 1.00      |            |
|   |   | 4.1950000 | 0.0485729  |
|   |   | 1.3770000 | 0.5105223  |
|   |   | 0.4828000 | 0.5730028  |
| D | 1 | 1.00      |            |
|   |   | 0.1501000 | 1.0000000  |

\*\*\*\*

! Elements

References

|            |                                                          |
|------------|----------------------------------------------------------|
| ! -----    | -----                                                    |
| ! Na - Hg: | P. J. Hay and W. R. Wadt, J. Chem. Phys. 82, 270 (1985). |
| !          | P. J. Hay and W. R. Wadt, J. Chem. Phys. 82, 284 (1985). |
| !          | P. J. Hay and W. R. Wadt, J. Chem. Phys. 82, 299 (1985). |
| !          |                                                          |

|        |             |             |  |
|--------|-------------|-------------|--|
| P      | 0           |             |  |
| P-ECP  | 2           | 10          |  |
| d      | potential   |             |  |
| 5      |             |             |  |
| 1      | 462.1211423 | -10.0000000 |  |
| 2      | 93.6863701  | -79.4864658 |  |
| 2      | 21.2349094  | -28.3668251 |  |
| 2      | 6.3388415   | -9.8577589  |  |
| 2      | 2.0620684   | -1.0163783  |  |
| s-d    | potential   |             |  |
| 5      |             |             |  |
| 0      | 78.0831823  | 3.0000000   |  |
| 1      | 58.9576810  | 12.9104154  |  |
| 2      | 36.0571255  | 150.0250298 |  |
| 2      | 11.2464453  | 71.7083146  |  |
| 2      | 2.6757561   | 23.0397012  |  |
| p-d    | potential   |             |  |
| 6      |             |             |  |
| 0      | 75.1617880  | 5.0000000   |  |
| 1      | 57.4544041  | 6.3446507   |  |
| 2      | 47.9481748  | 198.5585104 |  |
| 2      | 18.4588360  | 111.1470820 |  |
| 2      | 5.9414190   | 40.3944144  |  |
| 2      | 1.8487507   | 6.4483233   |  |
| S      | 0           |             |  |
| S-ECP  | 2           | 10          |  |
| d      | potential   |             |  |
| 5      |             |             |  |
| 1      | 532.6685222 | -10.0000000 |  |
| 2      | 108.1342248 | -85.3593846 |  |
| 2      | 24.5697664  | -30.4513290 |  |
| 2      | 7.3702438   | -10.3745886 |  |
| 2      | 2.3712569   | -0.9899295  |  |
| s-d    | potential   |             |  |
| 5      |             |             |  |
| 0      | 106.3176781 | 3.0000000   |  |
| 1      | 100.8245833 | 10.6284036  |  |
| 2      | 53.5858472  | 223.6360469 |  |
| 2      | 15.3706332  | 93.6460845  |  |
| 2      | 3.1778402   | 28.7609065  |  |
| p-d    | potential   |             |  |
| 6      |             |             |  |
| 0      | 101.9709185 | 5.0000000   |  |
| 1      | 93.2808973  | 6.0969842   |  |
| 2      | 65.1431772  | 285.4425500 |  |
| 2      | 24.6347440  | 147.1448413 |  |
| 2      | 7.8120535   | 53.6569778  |  |
| 2      | 2.3112730   | 8.9249559   |  |
| RU     | 0           |             |  |
| RU-ECP | 3           | 28          |  |
| f      | potential   |             |  |
| 5      |             |             |  |
| 0      | 554.3796303 | -0.0515270  |  |
| 1      | 155.1066871 | -20.1816536 |  |

|               |            |              |
|---------------|------------|--------------|
| 2             | 48.4976263 | -105.9966915 |
| 2             | 14.7701594 | -42.2166788  |
| 2             | 5.2077363  | -3.7675024   |
| s-f potential |            |              |
| 5             |            |              |
| 0             | 66.7118060 | 2.9578344    |
| 1             | 77.3503632 | 25.3748707   |
| 2             | 18.3571445 | 536.1262372  |
| 2             | 11.8404727 | -651.2057221 |
| 2             | 8.1179479  | 381.3816943  |
| p-f potential |            |              |
| 5             |            |              |
| 0             | 54.9937915 | 4.9651557    |
| 1             | 13.9399212 | 23.8861501   |
| 2             | 15.2118246 | 464.4631344  |
| 2             | 10.5460691 | -714.4451788 |
| 2             | 7.5539486  | 377.5503594  |
| d-f potential |            |              |
| 4             |            |              |
| 0             | 60.3444595 | 3.0352988    |
| 1             | 45.2100305 | 23.2901723   |
| 2             | 19.1190074 | 146.0926620  |
| 2             | 4.2712090  | 28.9129770   |

---

## Input Files.

### Cartesian Coordinates of Optimized Geometry,

### And Selection of Distances and Angles in the Optimized Geometry

Geometry Optimization of Complex 2 : input file.

```
#B3LYP/LanL2DZ opt
```

```
cisPt bipyTbu TTF)2 neutre singulet
```

```
0 1
Pt 0 -1.165500 -0.061000 -2.131000
N 0 -2.640500 -0.097000 -3.571000
C 0 -3.971500 -0.145000 -3.327000
C 0 -4.903500 -0.112000 -4.329000
C 0 -4.482500 -0.050000 -5.687000
C 0 -3.120500 -0.044000 -5.890000
C 0 -2.229500 -0.057000 -4.853000
C 0 -5.523500 -0.024000 -6.799000
C 0 -4.846500 0.046000 -8.204000
C 0 -6.423500 1.189000 -6.618000
N 0 -0.063500 0.027000 -3.862000
C 0 -6.368500 -1.279000 -6.730000
C 0 1.285500 0.104000 -3.928000
C 0 1.962500 0.104000 -5.147000
C 0 1.271500 0.023000 -6.328000
C 0 -0.114500 -0.020000 -6.257000
C 0 -0.762500 -0.012000 -5.029000
C 0 1.995500 0.003000 -7.665000
C 0 2.935500 -1.223000 -7.673000
C 0 2.823500 1.290000 -7.800000
C 0 1.076500 -0.091000 -8.849000
C 0 -2.404500 -0.142000 -0.625000
C 0 -3.217500 -0.177000 0.233000
C 0 -4.193500 -0.187000 1.312000
C 0 -5.512500 -0.166000 1.191000
C 0 -6.289500 -0.175000 -0.097000
S 0 -6.468500 -0.085000 2.655000
S 0 -3.540500 -0.137000 2.952000
C 0 -5.110500 -0.123000 3.772000
C 0 -5.236500 -0.085000 5.088000
S 0 -6.764500 -0.085000 5.929000
S 0 -3.833500 -0.080000 6.153000
C 0 -6.065500 -0.087000 7.567000
C 0 -7.072500 -0.078000 8.671000
C 0 -4.771500 -0.059000 7.635000
C 0 -3.930500 -0.067000 8.887000
C 0 0.391500 -0.018000 -0.945000
C 0 1.389500 -0.020000 -0.310000
C 0 2.555500 -0.020000 0.506000
C 0 3.841500 0.014000 0.124000
C 0 4.320500 0.036000 -1.287000
S 0 2.265500 -0.041000 2.266000
S 0 5.068500 -0.003000 1.378000
C 0 3.959500 -0.016000 2.748000
C 0 4.369500 -0.022000 4.006000
S 0 3.217500 -0.080000 5.357000
S 0 6.029500 0.032000 4.503000
C 0 4.436500 -0.121000 6.646000
C 0 3.932500 -0.181000 8.049000
C 0 5.709500 -0.087000 6.241000
C 0 6.933500 -0.160000 7.120000
H 0 -4.269500 -0.200000 -2.427000
```



|     |           |           |           |
|-----|-----------|-----------|-----------|
| H 0 | -5.827500 | -0.132000 | -4.119000 |
| H 0 | -2.789500 | -0.031000 | -6.778000 |
| H 0 | -5.537500 | 0.057000  | -8.901000 |
| H 0 | -4.270500 | -0.736000 | -8.330000 |
| H 0 | -4.307500 | 0.863000  | -8.265000 |
| H 0 | -7.090500 | 1.210000  | -7.334000 |
| H 0 | -5.882500 | 2.006000  | -6.653000 |
| H 0 | -6.875500 | 1.133000  | -5.751000 |
| H 0 | -7.030500 | -1.266000 | -7.451000 |
| H 0 | -6.826500 | -1.315000 | -5.865000 |
| H 0 | -5.792500 | -2.066000 | -6.828000 |
| H 0 | 1.785500  | 0.162000  | -3.123000 |
| H 0 | 2.911500  | 0.158000  | -5.158000 |
| H 0 | -0.625500 | -0.057000 | -7.056000 |
| H 0 | 3.557500  | -1.163000 | -6.919000 |
| H 0 | 3.441500  | -1.242000 | -8.513000 |
| H 0 | 2.404500  | -2.042000 | -7.592000 |
| H 0 | 3.439500  | 1.363000  | -7.041000 |
| H 0 | 2.222500  | 2.066000  | -7.809000 |
| H 0 | 3.334500  | 1.264000  | -8.634000 |
| H 0 | 0.538500  | -0.908000 | -8.779000 |
| H 0 | 1.606500  | -0.119000 | -9.673000 |
| H 0 | 0.484500  | 0.689000  | -8.866000 |
| H 0 | -6.475500 | 0.747000  | -0.373000 |
| H 0 | -7.132500 | -0.655000 | 0.034000  |
| H 0 | -5.764500 | -0.623000 | -0.791000 |
| H 0 | -7.518500 | -0.949000 | 8.715000  |
| H 0 | -7.738500 | 0.621000  | 8.502000  |
| H 0 | -6.623500 | 0.102000  | 9.521000  |
| H 0 | -3.390500 | 0.749000  | 8.924000  |
| H 0 | -3.339500 | -0.850000 | 8.878000  |
| H 0 | -4.513500 | -0.108000 | 9.673000  |
| H 0 | 4.679500  | -0.846000 | -1.525000 |
| H 0 | 5.023500  | 0.711000  | -1.384000 |
| H 0 | 3.571500  | 0.254000  | -1.883000 |
| H 0 | 3.351500  | -0.966000 | 8.152000  |
| H 0 | 3.423500  | 0.632000  | 8.247000  |
| H 0 | 4.690500  | -0.252000 | 8.665000  |
| H 0 | 6.963500  | 0.625000  | 7.707000  |
| H 0 | 7.738500  | -0.179000 | 6.558000  |
| H 0 | 6.896500  | -0.974000 | 7.665000  |

Cartesians Coordinates for the Optimized Geometry of Complex **2** (-1858.598128 Hartrees)

|    |          |          |          |
|----|----------|----------|----------|
| Pt | 0.00020  | 1.06621  | -0.00279 |
| N  | -1.31734 | 2.68722  | -0.07442 |
| C  | -2.67150 | 2.59227  | -0.15755 |
| C  | -3.49003 | 3.72100  | -0.21252 |
| C  | -2.92840 | 5.02173  | -0.18490 |
| C  | -1.52462 | 5.09592  | -0.09920 |
| C  | -0.73651 | 3.93102  | -0.04464 |
| C  | -3.83709 | 6.26406  | -0.25037 |
| C  | -3.03376 | 7.58694  | -0.20121 |
| C  | -4.82048 | 6.23872  | 0.95804  |
| N  | 1.31941  | 2.68575  | 0.07164  |
| C  | -4.64925 | 6.22817  | -1.57970 |
| C  | 2.67348  | 2.58928  | 0.15442  |
| C  | 3.49314  | 3.71707  | 0.21172  |
| C  | 2.93279  | 5.01841  | 0.18705  |
| C  | 1.52908  | 5.09419  | 0.10160  |
| C  | 0.73982  | 3.93020  | 0.04453  |
| C  | 3.84272  | 6.25970  | 0.25527  |
| C  | 4.82594  | 6.23616  | -0.95333 |
| C  | 4.65503  | 6.21991  | 1.58439  |
| C  | 3.04069  | 7.58348  | 0.20927  |
| C  | -1.37974 | -0.31577 | -0.06357 |

|   |           |          |          |
|---|-----------|----------|----------|
| C | -2.30142  | -1.14371 | -0.09861 |
| C | -3.36490  | -2.07429 | -0.13297 |
| C | -3.28832  | -3.39333 | -0.45936 |
| C | -2.03519  | -4.13199 | -0.84797 |
| S | -4.82771  | -4.38631 | -0.42262 |
| S | -5.04505  | -1.41321 | 0.32867  |
| C | -5.93834  | -2.98414 | 0.00780  |
| C | -7.27827  | -3.11029 | 0.09243  |
| S | -8.16837  | -4.69296 | -0.20634 |
| S | -8.39639  | -1.71723 | 0.53265  |
| C | -9.85855  | -3.97493 | -0.03483 |
| C | -10.97273 | -4.96427 | -0.27359 |
| C | -9.95956  | -2.66721 | 0.28987  |
| C | -11.21278 | -1.85313 | 0.49831  |
| C | 1.37877   | -0.31721 | 0.05675  |
| C | 2.29974   | -1.14595 | 0.09184  |
| C | 3.36260   | -2.07724 | 0.12624  |
| C | 3.28568   | -3.39558 | 0.45531  |
| C | 2.03271   | -4.13273 | 0.84727  |
| S | 5.04240   | -1.41839 | -0.34006 |
| S | 4.82437   | -4.38971 | 0.41750  |
| C | 5.93556   | -2.98818 | -0.01343 |
| C | 7.27571   | -3.11408 | -0.09488 |
| S | 8.39437   | -1.72181 | -0.53612 |
| S | 8.16572   | -4.69580 | 0.20904  |
| C | 9.95735   | -2.66856 | -0.27945 |
| C | 11.21075  | -1.85308 | -0.48116 |
| C | 9.85605   | -3.97558 | 0.04797  |
| C | 10.97001  | -4.96256 | 0.29727  |
| H | -3.07280  | 1.58628  | -0.18025 |
| H | -4.56229  | 3.57129  | -0.27716 |
| H | -1.03574  | 6.06068  | -0.07587 |
| H | -3.72587  | 8.43580  | -0.25521 |
| H | -2.33881  | 7.67604  | -1.04681 |
| H | -2.46472  | 7.68632  | 0.73273  |
| H | -5.48373  | 7.11219  | 0.91690  |
| H | -4.27639  | 6.26647  | 1.91074  |
| H | -5.45030  | 5.34141  | 0.95533  |
| H | -5.31604  | 7.09828  | -1.63230 |
| H | -5.26905  | 5.32717  | -1.65596 |
| H | -3.98262  | 6.25410  | -2.45110 |
| H | 3.07378   | 1.58284  | 0.17498  |
| H | 4.56525   | 3.56616  | 0.27589  |
| H | 1.04116   | 6.05948  | 0.08045  |
| H | 5.45474   | 5.33813  | -0.95283 |
| H | 5.49019   | 7.10877  | -0.91019 |
| H | 4.28176   | 6.26680  | -1.90589 |
| H | 5.27421   | 5.31829  | 1.65830  |
| H | 3.98854   | 6.24412  | 2.45594  |
| H | 5.32244   | 7.08942  | 1.63908  |
| H | 2.47160   | 7.68555  | -0.72434 |
| H | 3.73364   | 8.43154  | 0.26508  |
| H | 2.34596   | 7.67132  | 1.05518  |
| H | -2.12344  | -4.56591 | -1.85343 |
| H | -1.82365  | -4.95200 | -0.14718 |
| H | -1.18595  | -3.44223 | -0.84279 |
| H | -10.89601 | -5.81533 | 0.41661  |
| H | -10.93281 | -5.36240 | -1.29638 |
| H | -11.95386 | -4.50226 | -0.12943 |
| H | -11.26863 | -1.02480 | -0.22090 |
| H | -11.23584 | -1.41899 | 1.50715  |
| H | -12.11054 | -2.46626 | 0.37608  |
| H | 2.12197   | -4.56419 | 1.85370  |
| H | 1.81998   | -4.95440 | 0.14878  |
| H | 1.18374   | -3.44263 | 0.84137  |
| H | 11.26173  | -1.02458 | 0.23822  |
| H | 11.23883  | -1.41907 | -1.48993 |
| H | 12.10854  | -2.46518 | -0.35399 |

|   |          |          |          |
|---|----------|----------|----------|
| H | 10.89789 | -5.81690 | -0.38937 |
| H | 10.92507 | -5.35599 | 1.32166  |
| H | 11.95139 | -4.50014 | 0.15615  |

### Selection of distances (Å) for the Optimized Geometry of Complex **2**

Pt-N : 2.090

Pt-C≡C-C : 1.954, 1.239, 1.414

TTF Central C-C distance : 1.349

### Selection of angles (°) for the Optimized Geometry of Complex **2**

Pt-C≡C : 176.9

C≡C-C : 179.2

### Geometry Optimization of Complex **2**<sup>+</sup> : input file.

```
#B3LYP/LanL2DZ opt
```

```
cisPt bipyTbu TTF)2 cation doublet
```

```
1 2
Pt 0 -1.165500 -0.061000 -2.131000
N 0 -2.640500 -0.097000 -3.571000
C 0 -3.971500 -0.145000 -3.327000
C 0 -4.903500 -0.112000 -4.329000
C 0 -4.482500 -0.050000 -5.687000
C 0 -3.120500 -0.044000 -5.890000
C 0 -2.229500 -0.057000 -4.853000
C 0 -5.523500 -0.024000 -6.799000
C 0 -4.846500 0.046000 -8.204000
C 0 -6.423500 1.189000 -6.618000
N 0 -0.063500 0.027000 -3.862000
C 0 -6.368500 -1.279000 -6.730000
C 0 1.285500 0.104000 -3.928000
C 0 1.962500 0.104000 -5.147000
C 0 1.271500 0.023000 -6.328000
C 0 -0.114500 -0.020000 -6.257000
C 0 -0.762500 -0.012000 -5.029000
C 0 1.995500 0.003000 -7.665000
C 0 2.935500 -1.223000 -7.673000
C 0 2.823500 1.290000 -7.800000
C 0 1.076500 -0.091000 -8.849000
C 0 -2.404500 -0.142000 -0.625000
C 0 -3.217500 -0.177000 0.233000
C 0 -4.193500 -0.187000 1.312000
C 0 -5.512500 -0.166000 1.191000
C 0 -6.289500 -0.175000 -0.097000
S 0 -6.468500 -0.085000 2.655000
S 0 -3.540500 -0.137000 2.952000
C 0 -5.110500 -0.123000 3.772000
C 0 -5.236500 -0.085000 5.088000
S 0 -6.764500 -0.085000 5.929000
S 0 -3.833500 -0.080000 6.153000
C 0 -6.065500 -0.087000 7.567000
C 0 -7.072500 -0.078000 8.671000
C 0 -4.771500 -0.059000 7.635000
C 0 -3.930500 -0.067000 8.887000
C 0 0.391500 -0.018000 -0.945000
C 0 1.389500 -0.020000 -0.310000
C 0 2.555500 -0.020000 0.506000
C 0 3.841500 0.014000 0.124000
C 0 4.320500 0.036000 -1.287000
S 0 2.265500 -0.041000 2.266000
S 0 5.068500 -0.003000 1.378000
```

|     |           |           |           |
|-----|-----------|-----------|-----------|
| C 0 | 3.959500  | -0.016000 | 2.748000  |
| C 0 | 4.369500  | -0.022000 | 4.006000  |
| S 0 | 3.217500  | -0.080000 | 5.357000  |
| S 0 | 6.029500  | 0.032000  | 4.503000  |
| C 0 | 4.436500  | -0.121000 | 6.646000  |
| C 0 | 3.932500  | -0.181000 | 8.049000  |
| C 0 | 5.709500  | -0.087000 | 6.241000  |
| C 0 | 6.933500  | -0.160000 | 7.120000  |
| H 0 | -4.269500 | -0.200000 | -2.427000 |
| H 0 | -5.827500 | -0.132000 | -4.119000 |
| H 0 | -2.789500 | -0.031000 | -6.778000 |
| H 0 | -5.537500 | 0.057000  | -8.901000 |
| H 0 | -4.270500 | -0.736000 | -8.330000 |
| H 0 | -4.307500 | 0.863000  | -8.265000 |
| H 0 | -7.090500 | 1.210000  | -7.334000 |
| H 0 | -5.882500 | 2.006000  | -6.653000 |
| H 0 | -6.875500 | 1.133000  | -5.751000 |
| H 0 | -7.030500 | -1.266000 | -7.451000 |
| H 0 | -6.826500 | -1.315000 | -5.865000 |
| H 0 | -5.792500 | -2.066000 | -6.828000 |
| H 0 | 1.785500  | 0.162000  | -3.123000 |
| H 0 | 2.911500  | 0.158000  | -5.158000 |
| H 0 | -0.625500 | -0.057000 | -7.056000 |
| H 0 | 3.557500  | -1.163000 | -6.919000 |
| H 0 | 3.441500  | -1.242000 | -8.513000 |
| H 0 | 2.404500  | -2.042000 | -7.592000 |
| H 0 | 3.439500  | 1.363000  | -7.041000 |
| H 0 | 2.222500  | 2.066000  | -7.809000 |
| H 0 | 3.334500  | 1.264000  | -8.634000 |
| H 0 | 0.538500  | -0.908000 | -8.779000 |
| H 0 | 1.606500  | -0.119000 | -9.673000 |
| H 0 | 0.484500  | 0.689000  | -8.866000 |
| H 0 | -6.475500 | 0.747000  | -0.373000 |
| H 0 | -7.132500 | -0.655000 | 0.034000  |
| H 0 | -5.764500 | -0.623000 | -0.791000 |
| H 0 | -7.518500 | -0.949000 | 8.715000  |
| H 0 | -7.738500 | 0.621000  | 8.502000  |
| H 0 | -6.623500 | 0.102000  | 9.521000  |
| H 0 | -3.390500 | 0.749000  | 8.924000  |
| H 0 | -3.339500 | -0.850000 | 8.878000  |
| H 0 | -4.513500 | -0.108000 | 9.673000  |
| H 0 | 4.679500  | -0.846000 | -1.525000 |
| H 0 | 5.023500  | 0.711000  | -1.384000 |
| H 0 | 3.571500  | 0.254000  | -1.883000 |
| H 0 | 3.351500  | -0.966000 | 8.152000  |
| H 0 | 3.423500  | 0.632000  | 8.247000  |
| H 0 | 4.690500  | -0.252000 | 8.665000  |
| H 0 | 6.963500  | 0.625000  | 7.707000  |
| H 0 | 7.738500  | -0.179000 | 6.558000  |
| H 0 | 6.896500  | -0.974000 | 7.665000  |

Cartesians Coordinates for the Optimized Geometry of Complex  $2^+$  (-1858.4071051 Hartrees)

|    |          |         |          |
|----|----------|---------|----------|
| Pt | -0.00001 | 1.45536 | -0.00012 |
| N  | -1.30348 | 3.07714 | -0.22945 |
| C  | -2.63751 | 2.98466 | -0.47420 |
| C  | -3.44165 | 4.11455 | -0.63180 |
| C  | -2.88507 | 5.41398 | -0.54155 |
| C  | -1.50056 | 5.48441 | -0.28571 |
| C  | -0.72832 | 4.31960 | -0.13309 |
| C  | -3.77306 | 6.65848 | -0.72399 |
| C  | -2.97577 | 7.97839 | -0.58293 |
| C  | -4.89799 | 6.64190 | 0.35450  |
| N  | 1.30346  | 3.07713 | 0.22936  |
| C  | -4.41378 | 6.61577 | -2.14429 |
| C  | 2.63748  | 2.98462 | 0.47409  |
| C  | 3.44162  | 4.11450 | 0.63178  |
| C  | 2.88504  | 5.41394 | 0.54163  |

|   |           |          |          |
|---|-----------|----------|----------|
| C | 1.50053   | 5.48439  | 0.28581  |
| C | 0.72829   | 4.31959  | 0.13309  |
| C | 3.77304   | 6.65842  | 0.72417  |
| C | 4.89801   | 6.64190  | -0.35428 |
| C | 4.41372   | 6.61562  | 2.14449  |
| C | 2.97578   | 7.97836  | 0.58316  |
| C | -1.34606  | 0.06150  | -0.23239 |
| C | -2.20625  | -0.81970 | -0.38349 |
| C | -3.16429  | -1.83625 | -0.55424 |
| C | -3.00741  | -2.98740 | -1.28217 |
| C | -1.77066  | -3.38174 | -2.04412 |
| S | -4.40623  | -4.14584 | -1.35361 |
| S | -4.79832  | -1.59957 | 0.28576  |
| C | -5.52554  | -3.15758 | -0.30997 |
| C | -6.79171  | -3.56106 | -0.00140 |
| S | -7.51178  | -5.12611 | -0.59112 |
| S | -7.91535  | -2.58227 | 1.04345  |
| C | -9.13835  | -4.90074 | 0.23888  |
| C | -10.11240 | -6.02946 | 0.01071  |
| C | -9.31798  | -3.77138 | 0.96470  |
| C | -10.53975 | -3.34283 | 1.73809  |
| C | 1.34603   | 0.06149  | 0.23220  |
| C | 2.20621   | -0.81972 | 0.38331  |
| C | 3.16427   | -1.83623 | 0.55414  |
| C | 3.00746   | -2.98726 | 1.28228  |
| C | 1.77079   | -3.38148 | 2.04442  |
| S | 4.79823   | -1.59968 | -0.28604 |
| S | 4.40629   | -4.14568 | 1.35379  |
| C | 5.52554   | -3.15756 | 0.30994  |
| C | 6.79171   | -3.56103 | 0.00140  |
| S | 7.91527   | -2.58238 | -1.04367 |
| S | 7.51187   | -5.12594 | 0.59136  |
| C | 9.31797   | -3.77139 | -0.96472 |
| C | 10.53971  | -3.34289 | -1.73819 |
| C | 9.13842   | -4.90062 | -0.23869 |
| C | 10.11254  | -6.02925 | -0.01032 |
| H | -3.03879  | 1.98116  | -0.54330 |
| H | -4.49844  | 3.96921  | -0.82674 |
| H | -1.01810  | 6.44901  | -0.20638 |
| H | -3.65336  | 8.82862  | -0.72199 |
| H | -2.18533  | 8.06490  | -1.34034 |
| H | -2.52356  | 8.08120  | 0.41251  |
| H | -5.54662  | 7.51685  | 0.22489  |
| H | -4.47747  | 6.67682  | 1.36754  |
| H | -5.52750  | 5.74727  | 0.27926  |
| H | -5.06217  | 7.48934  | -2.28390 |
| H | -5.02702  | 5.71892  | -2.29177 |
| H | -3.64484  | 6.63355  | -2.92704 |
| H | 3.03877   | 1.98112  | 0.54311  |
| H | 4.49841   | 3.96916  | 0.82670  |
| H | 1.01807   | 6.44900  | 0.20657  |
| H | 5.52752   | 5.74726  | -0.27908 |
| H | 5.54664   | 7.51684  | -0.22459 |
| H | 4.47752   | 6.67688  | -1.36734 |
| H | 5.02694   | 5.71876  | 2.29193  |
| H | 3.64475   | 6.63337  | 2.92721  |
| H | 5.06212   | 7.48918  | 2.28417  |
| H | 2.52358   | 8.08122  | -0.41228 |
| H | 3.65339   | 8.82857  | 0.72226  |
| H | 2.18534   | 8.06485  | 1.34057  |
| H | -1.97828  | -3.47964 | -3.11811 |
| H | -1.37485  | -4.34358 | -1.69164 |
| H | -0.99793  | -2.61967 | -1.91039 |
| H | -9.70771  | -6.98053 | 0.38017  |
| H | -10.33121 | -6.15165 | -1.05796 |
| H | -11.05827 | -5.84524 | 0.52686  |
| H | -10.93765 | -2.39448 | 1.35420  |
| H | -10.30446 | -3.20161 | 2.80087  |

|   |           |          |          |
|---|-----------|----------|----------|
| H | -11.33341 | -4.09133 | 1.66822  |
| H | 1.97845   | -3.47887 | 3.11845  |
| H | 1.37514   | -4.34354 | 1.69237  |
| H | 0.99793   | -2.61960 | 1.91038  |
| H | 10.93744  | -2.39436 | -1.35460 |
| H | 10.30443  | -3.20206 | -2.80103 |
| H | 11.33348  | -4.09125 | -1.66805 |
| H | 9.70782   | -6.98044 | -0.37943 |
| H | 10.33152  | -6.15109 | 1.05836  |
| H | 11.05832  | -5.84515 | -0.52668 |

Selection of distances (Å) for the Optimized Geometry of Complex **2**<sup>+</sup>

Pt-N : 2.093

Pt-C≡C-C : 1.952, 1.241, 1.407

TTF Central C-C distance : 1.364

Selection of angles (°) for the Optimized Geometry of Complex **2**<sup>+</sup>

Pt-C≡C : 179.7

C≡C-C : 179.0

Geometry Optimization of Complex **3** : input file.

#B3LYP/LanL2DZ opt

cisPt dppe TTF)2 neutre singulet

|      | 0         | 1         |           |
|------|-----------|-----------|-----------|
| Pt 0 | 0.704500  | -0.143000 | 0.384500  |
| P 0  | 1.751500  | 1.007000  | 2.070500  |
| P 0  | 2.306500  | 0.742000  | -0.979500 |
| C 0  | 3.330500  | -0.423000 | -1.923500 |
| C 0  | 3.138500  | -1.769000 | -1.847500 |
| C 0  | 3.979500  | -2.613000 | -2.551500 |
| C 0  | 5.041500  | -2.179000 | -3.221500 |
| C 0  | 5.220500  | -0.833000 | -3.294500 |
| C 0  | 4.395500  | 0.066000  | -2.683500 |
| C 0  | 1.713500  | 1.929000  | -2.201500 |
| C 0  | 0.998500  | 1.523000  | -3.281500 |
| C 0  | 0.500500  | 2.410000  | -4.228500 |
| C 0  | 0.719500  | 3.702000  | -4.119500 |
| C 0  | 1.473500  | 4.150000  | -3.049500 |
| C 0  | 1.982500  | 3.280000  | -2.101500 |
| C 0  | 0.822500  | 1.895000  | 3.343500  |
| C 0  | 0.930500  | 3.258000  | 3.569500  |
| C 0  | 0.209500  | 3.896000  | 4.582500  |
| C 0  | -0.629500 | 3.166000  | 5.365500  |
| C 0  | -0.763500 | 1.796000  | 5.157500  |
| C 0  | -0.048500 | 1.184000  | 4.129500  |
| C 0  | 2.920500  | 0.037000  | 3.063500  |
| C 0  | 3.666500  | 0.625000  | 4.067500  |
| C 0  | 4.605500  | -0.093000 | 4.757500  |
| C 0  | 4.793500  | -1.404000 | 4.523500  |
| C 0  | 4.042500  | -1.999000 | 3.565500  |
| C 0  | 3.118500  | -1.302000 | 2.815500  |
| C 0  | 2.815500  | 2.249000  | 1.252500  |
| C 0  | 3.554500  | 1.594000  | 0.071500  |
| S 0  | -2.984500 | -3.808000 | -4.569500 |
| S 0  | -0.840500 | -1.798000 | -4.836500 |
| S 0  | -3.580500 | -3.599000 | -7.753500 |
| S 0  | -1.591500 | -1.460000 | -7.997500 |
| C 0  | -0.128500 | -1.105000 | -1.151500 |
| C 0  | -0.649500 | -1.629000 | -2.106500 |
| C 0  | -1.335500 | -2.243000 | -3.192500 |
| C 0  | -2.304500 | -3.161000 | -3.106500 |

|     |           |           |            |
|-----|-----------|-----------|------------|
| C 0 | -2.819500 | -3.725000 | -1.796500  |
| C 0 | -2.121500 | -2.696000 | -5.634500  |
| C 0 | -2.412500 | -2.594000 | -6.936500  |
| C 0 | -3.611500 | -2.665000 | -9.234500  |
| C 0 | -4.615500 | -3.071000 | -10.262500 |
| C 0 | -2.707500 | -1.677000 | -9.330500  |
| C 0 | -2.551500 | -0.707000 | -10.487500 |
| S 0 | -3.141500 | -0.872000 | 4.412500   |
| S 0 | -4.121500 | -3.640000 | 4.465500   |
| S 0 | -3.814500 | -0.494000 | 7.524500   |
| S 0 | -4.722500 | -3.282000 | 7.742500   |
| C 0 | -0.715500 | -0.925000 | 1.566500   |
| C 0 | -1.583500 | -1.425000 | 2.209500   |
| C 0 | -2.546500 | -1.961000 | 3.135500   |
| C 0 | -3.046500 | -3.187000 | 3.149500   |
| C 0 | -2.836500 | -4.291000 | 2.066500   |
| C 0 | -3.802500 | -2.167000 | 5.396500   |
| C 0 | -4.079500 | -2.020000 | 6.693500   |
| C 0 | -4.150500 | -1.101000 | 9.140500   |
| C 0 | -3.953500 | -0.096000 | 10.240500  |
| C 0 | -4.554500 | -2.364000 | 9.239500   |
| C 0 | -4.980500 | -3.120000 | 10.492500  |
| H 0 | 2.435500  | -2.125000 | -1.315500  |
| H 0 | 3.789500  | -3.545000 | -2.554500  |
| H 0 | 5.647500  | -2.781000 | -3.634500  |
| H 0 | 5.958500  | -0.501000 | -3.792500  |
| H 0 | 4.542500  | 0.999000  | -2.775500  |
| H 0 | 0.833500  | 0.594000  | -3.396500  |
| H 0 | -0.005500 | 2.080000  | -4.962500  |
| H 0 | 0.368500  | 4.311000  | -4.757500  |
| H 0 | 1.644500  | 5.081000  | -2.963500  |
| H 0 | 2.514500  | 3.609000  | -1.385500  |
| H 0 | 1.510500  | 3.773000  | 3.020500   |
| H 0 | 0.306500  | 4.830000  | 4.724500   |
| H 0 | -1.125500 | 3.593000  | 6.055500   |
| H 0 | -1.337500 | 1.282000  | 5.712500   |
| H 0 | -0.165500 | 0.255000  | 3.971500   |
| H 0 | 3.527500  | 1.540000  | 4.278500   |
| H 0 | 5.134500  | 0.343000  | 5.414500   |
| H 0 | 5.436500  | -1.900000 | 5.018500   |
| H 0 | 4.156500  | -2.931000 | 3.403500   |
| H 0 | 2.622500  | -1.741000 | 2.135500   |
| H 0 | 2.260500  | 3.000000  | 0.926500   |
| H 0 | 3.471500  | 2.607000  | 1.900500   |
| H 0 | 4.220500  | 0.945000  | 0.404500   |
| H 0 | 4.028500  | 2.287000  | -0.457500  |
| H 0 | -2.489500 | -3.177000 | -1.055500  |
| H 0 | -2.499500 | -4.644000 | -1.689500  |
| H 0 | -3.798500 | -3.718000 | -1.798500  |
| H 0 | -5.514500 | -2.843000 | -9.949500  |
| H 0 | -4.558500 | -4.038000 | -10.411500 |
| H 0 | -4.431500 | -2.601000 | -11.101500 |
| H 0 | -2.984500 | -1.077000 | -11.283500 |
| H 0 | -1.598500 | -0.567000 | -10.669500 |
| H 0 | -2.966500 | 0.148000  | -10.256500 |
| H 0 | -3.703500 | -4.535000 | 1.676500   |
| H 0 | -2.429500 | -5.081000 | 2.475500   |
| H 0 | -2.246500 | -3.950000 | 1.359500   |
| H 0 | -4.316500 | -0.451000 | 11.075500  |
| H 0 | -4.419500 | 0.736000  | 10.008500  |
| H 0 | -2.996500 | 0.087000  | 10.349500  |
| H 0 | -4.595500 | -2.689000 | 11.283500  |
| H 0 | -4.662500 | -4.047000 | 10.438500  |
| H 0 | -5.958500 | -3.116000 | 10.560500  |

Cartesians Coordinates for the Optimized Geometry of Complex **3** (-2066.8664987 Hartrees)

|    |           |          |          |
|----|-----------|----------|----------|
| Pt | 0.01092   | -1.48158 | 0.08916  |
| P  | 1.61205   | -3.32611 | 0.04410  |
| P  | -1.66788  | -3.22032 | -0.15903 |
| C  | -3.13578  | -3.25883 | 1.00353  |
| C  | -3.11817  | -2.43621 | 2.14854  |
| C  | -4.19194  | -2.47675 | 3.05763  |
| C  | -5.28500  | -3.33200 | 2.82449  |
| C  | -5.30810  | -4.14454 | 1.67375  |
| C  | -4.23758  | -4.10686 | 0.76227  |
| C  | -2.37022  | -3.38393 | -1.89062 |
| C  | -2.69270  | -2.19415 | -2.58108 |
| C  | -3.24169  | -2.25690 | -3.87435 |
| C  | -3.46269  | -3.50259 | -4.49311 |
| C  | -3.13576  | -4.68950 | -3.81072 |
| C  | -2.59504  | -4.63112 | -2.51216 |
| C  | 3.11616   | -3.31930 | -1.07196 |
| C  | 3.40453   | -4.38248 | -1.95436 |
| C  | 4.55579   | -4.33650 | -2.76361 |
| C  | 5.42636   | -3.23285 | -2.69274 |
| C  | 5.14004   | -2.17095 | -1.81278 |
| C  | 3.98900   | -2.21113 | -1.00683 |
| C  | 2.27784   | -3.78297 | 1.74019  |
| C  | 3.22290   | -4.82005 | 1.89762  |
| C  | 3.68669   | -5.16185 | 3.18030  |
| C  | 3.21426   | -4.46523 | 4.31110  |
| C  | 2.28287   | -3.42211 | 4.15368  |
| C  | 1.81546   | -3.07818 | 2.87051  |
| C  | 0.62181   | -4.87120 | -0.47634 |
| C  | -0.76553  | -4.85931 | 0.19205  |
| S  | -4.28435  | 4.40673  | 0.00066  |
| S  | -4.92962  | 1.40930  | 0.25973  |
| S  | -7.56419  | 5.10473  | -0.19629 |
| S  | -8.22193  | 2.11274  | 0.05580  |
| C  | -1.35348  | -0.05194 | 0.11750  |
| C  | -2.19128  | 0.86060  | 0.11047  |
| C  | -3.14228  | 1.90738  | 0.09746  |
| C  | -2.87484  | 3.23743  | -0.01449 |
| C  | -1.50676  | 3.85333  | -0.14388 |
| C  | -5.58973  | 3.11123  | 0.06414  |
| C  | -6.90550  | 3.39585  | -0.01622 |
| C  | -9.32053  | 4.58729  | -0.42267 |
| C  | -10.26620 | 5.72916  | -0.70369 |
| C  | -9.60995  | 3.27211  | -0.31157 |
| C  | -10.95524 | 2.60057  | -0.43808 |
| S  | 4.64993   | 1.76639  | -0.63613 |
| S  | 4.64060   | 4.00317  | 1.46990  |
| S  | 7.80412   | 2.58647  | -1.49065 |
| S  | 7.78881   | 4.82989  | 0.60838  |
| C  | 1.41013   | -0.09463 | 0.29472  |
| C  | 2.24862   | 0.80825  | 0.42619  |
| C  | 3.22944   | 1.81714  | 0.57274  |
| C  | 3.23694   | 2.82256  | 1.48839  |
| C  | 2.17849   | 3.07390  | 2.52956  |
| C  | 5.59314   | 3.11940  | 0.16764  |
| C  | 6.85392   | 3.45321  | -0.17524 |
| C  | 9.39706   | 3.45436  | -1.14696 |
| C  | 10.55819  | 2.96056  | -1.97437 |
| C  | 9.38963   | 4.44101  | -0.22436 |
| C  | 10.54115  | 5.30809  | 0.22195  |
| H  | -2.28815  | -1.75445 | 2.31174  |
| H  | -4.18062  | -1.83054 | 3.93141  |
| H  | -6.11766  | -3.35486 | 3.52340  |
| H  | -6.15797  | -4.79509 | 1.48217  |
| H  | -4.27816  | -4.71798 | -0.13612 |
| H  | -2.51341  | -1.22843 | -2.11566 |



|   |           |          |          |
|---|-----------|----------|----------|
| H | -3.48970  | -1.33586 | -4.39516 |
| H | -3.88164  | -3.54767 | -5.49550 |
| H | -3.30129  | -5.65480 | -4.28326 |
| H | -2.35046  | -5.56163 | -2.00559 |
| H | 2.74770   | -5.24470 | -2.02758 |
| H | 4.76864   | -5.15780 | -3.44381 |
| H | 6.31452   | -3.19794 | -3.31912 |
| H | 5.79853   | -1.30845 | -1.75542 |
| H | 3.76711   | -1.37864 | -0.34624 |
| H | 3.61424   | -5.34457 | 1.02833  |
| H | 4.41756   | -5.95848 | 3.29665  |
| H | 3.57791   | -4.72684 | 5.30195  |
| H | 1.92771   | -2.87165 | 5.02119  |
| H | 1.11319   | -2.25797 | 2.74264  |
| H | 0.52248   | -4.84746 | -1.56825 |
| H | 1.17647   | -5.77427 | -0.19558 |
| H | -0.67524  | -4.92470 | 1.28291  |
| H | -1.36823  | -5.71389 | -0.13492 |
| H | -0.74380  | 3.06991  | -0.11137 |
| H | -1.31268  | 4.56498  | 0.67096  |
| H | -1.40351  | 4.39781  | -1.09253 |
| H | -10.00544 | 6.23364  | -1.64376 |
| H | -10.22464 | 6.47943  | 0.09760  |
| H | -11.30007 | 5.38027  | -0.78346 |
| H | -11.74979 | 3.33121  | -0.61616 |
| H | -11.20522 | 2.04703  | 0.47732  |
| H | -10.96097 | 1.88432  | -1.27069 |
| H | 1.76394   | 4.08749  | 2.43774  |
| H | 2.58448   | 2.97083  | 3.54533  |
| H | 1.36325   | 2.35453  | 2.40658  |
| H | 11.46317  | 3.54286  | -1.77725 |
| H | 10.33589  | 3.03692  | -3.04741 |
| H | 10.77912  | 1.90732  | -1.75512 |
| H | 11.45305  | 5.07796  | -0.33688 |
| H | 10.75241  | 5.16321  | 1.28982  |
| H | 10.31245  | 6.37176  | 0.07068  |

Selection of distances (Å) for the Optimized Geometry of Complex **3**

Pt-P : 2.430 or 2.443

Pt-C≡C-C : 1.976, 1.239, 1.414 or 1.981, 1.239, 1.415

TTF Central C-C distance : 1.349

Selection of angles (°) for the Optimized Geometry of Complex **3**

Pt-C≡C : 178.4 or 176.6

C≡C-C : 179.6 or 178.7

Geometry Optimization of Complex **3**<sup>+</sup> : input file.

```
#B3LYP/LanL2DZ opt
```

```
cisPt dppe TTF)2 cation doublet
```

```
1 2
```

|    |          |          |          |
|----|----------|----------|----------|
| Pt | 0.01092  | -1.48158 | 0.08916  |
| P  | 1.61205  | -3.32611 | 0.04410  |
| P  | -1.66788 | -3.22032 | -0.15903 |
| C  | -3.13578 | -3.25883 | 1.00353  |
| C  | -3.11817 | -2.43621 | 2.14854  |
| C  | -4.19194 | -2.47675 | 3.05763  |
| C  | -5.28500 | -3.33200 | 2.82449  |
| C  | -5.30810 | -4.14454 | 1.67375  |
| C  | -4.23758 | -4.10686 | 0.76227  |
| C  | -2.37022 | -3.38393 | -1.89062 |

|   |           |          |          |
|---|-----------|----------|----------|
| C | -2.69270  | -2.19415 | -2.58108 |
| C | -3.24169  | -2.25690 | -3.87435 |
| C | -3.46269  | -3.50259 | -4.49311 |
| C | -3.13576  | -4.68950 | -3.81072 |
| C | -2.59504  | -4.63112 | -2.51216 |
| C | 3.11616   | -3.31930 | -1.07196 |
| C | 3.40453   | -4.38248 | -1.95436 |
| C | 4.55579   | -4.33650 | -2.76361 |
| C | 5.42636   | -3.23285 | -2.69274 |
| C | 5.14004   | -2.17095 | -1.81278 |
| C | 3.98900   | -2.21113 | -1.00683 |
| C | 2.27784   | -3.78297 | 1.74019  |
| C | 3.22290   | -4.82005 | 1.89762  |
| C | 3.68669   | -5.16185 | 3.18030  |
| C | 3.21426   | -4.46523 | 4.31110  |
| C | 2.28287   | -3.42211 | 4.15368  |
| C | 1.81546   | -3.07818 | 2.87051  |
| C | 0.62181   | -4.87120 | -0.47634 |
| C | -0.76553  | -4.85931 | 0.19205  |
| S | -4.28435  | 4.40673  | 0.00066  |
| S | -4.92962  | 1.40930  | 0.25973  |
| S | -7.56419  | 5.10473  | -0.19629 |
| S | -8.22193  | 2.11274  | 0.05580  |
| C | -1.35348  | -0.05194 | 0.11750  |
| C | -2.19128  | 0.86060  | 0.11047  |
| C | -3.14228  | 1.90738  | 0.09746  |
| C | -2.87484  | 3.23743  | -0.01449 |
| C | -1.50676  | 3.85333  | -0.14388 |
| C | -5.58973  | 3.11123  | 0.06414  |
| C | -6.90550  | 3.39585  | -0.01622 |
| C | -9.32053  | 4.58729  | -0.42267 |
| C | -10.26620 | 5.72916  | -0.70369 |
| C | -9.60995  | 3.27211  | -0.31157 |
| C | -10.95524 | 2.60057  | -0.43808 |
| S | 4.64993   | 1.76639  | -0.63613 |
| S | 4.64060   | 4.00317  | 1.46990  |
| S | 7.80412   | 2.58647  | -1.49065 |
| S | 7.78881   | 4.82989  | 0.60838  |
| C | 1.41013   | -0.09463 | 0.29472  |
| C | 2.24862   | 0.80825  | 0.42619  |
| C | 3.22944   | 1.81714  | 0.57274  |
| C | 3.23694   | 2.82256  | 1.48839  |
| C | 2.17849   | 3.07390  | 2.52956  |
| C | 5.59314   | 3.11940  | 0.16764  |
| C | 6.85392   | 3.45321  | -0.17524 |
| C | 9.39706   | 3.45436  | -1.14696 |
| C | 10.55819  | 2.96056  | -1.97437 |
| C | 9.38963   | 4.44101  | -0.22436 |
| C | 10.54115  | 5.30809  | 0.22195  |
| H | -2.28815  | -1.75445 | 2.31174  |
| H | -4.18062  | -1.83054 | 3.93141  |
| H | -6.11766  | -3.35486 | 3.52340  |
| H | -6.15797  | -4.79509 | 1.48217  |
| H | -4.27816  | -4.71798 | -0.13612 |
| H | -2.51341  | -1.22843 | -2.11566 |
| H | -3.48970  | -1.33586 | -4.39516 |
| H | -3.88164  | -3.54767 | -5.49550 |
| H | -3.30129  | -5.65480 | -4.28326 |
| H | -2.35046  | -5.56163 | -2.00559 |
| H | 2.74770   | -5.24470 | -2.02758 |
| H | 4.76864   | -5.15780 | -3.44381 |
| H | 6.31452   | -3.19794 | -3.31912 |
| H | 5.79853   | -1.30845 | -1.75542 |
| H | 3.76711   | -1.37864 | -0.34624 |
| H | 3.61424   | -5.34457 | 1.02833  |
| H | 4.41756   | -5.95848 | 3.29665  |
| H | 3.57791   | -4.72684 | 5.30195  |
| H | 1.92771   | -2.87165 | 5.02119  |

|   |           |          |          |
|---|-----------|----------|----------|
| H | 1.11319   | -2.25797 | 2.74264  |
| H | 0.52248   | -4.84746 | -1.56825 |
| H | 1.17647   | -5.77427 | -0.19558 |
| H | -0.67524  | -4.92470 | 1.28291  |
| H | -1.36823  | -5.71389 | -0.13492 |
| H | -0.74380  | 3.06991  | -0.11137 |
| H | -1.31268  | 4.56498  | 0.67096  |
| H | -1.40351  | 4.39781  | -1.09253 |
| H | -10.00544 | 6.23364  | -1.64376 |
| H | -10.22464 | 6.47943  | 0.09760  |
| H | -11.30007 | 5.38027  | -0.78346 |
| H | -11.74979 | 3.33121  | -0.61616 |
| H | -11.20522 | 2.04703  | 0.47732  |
| H | -10.96097 | 1.88432  | -1.27069 |
| H | 1.76394   | 4.08749  | 2.43774  |
| H | 2.58448   | 2.97083  | 3.54533  |
| H | 1.36325   | 2.35453  | 2.40658  |
| H | 11.46317  | 3.54286  | -1.77725 |
| H | 10.33589  | 3.03692  | -3.04741 |
| H | 10.77912  | 1.90732  | -1.75512 |
| H | 11.45305  | 5.07796  | -0.33688 |
| H | 10.75241  | 5.16321  | 1.28982  |
| H | 10.31245  | 6.37176  | 0.07068  |

Cartesians Coordinates for the Optimized Geometry of Complex  $3^+$  (-2066.6758857 Hartrees)

|    |          |          |          |
|----|----------|----------|----------|
| Pt | 0.00005  | -1.47216 | -0.00038 |
| P  | -1.63272 | -3.26420 | -0.22255 |
| P  | 1.63259  | -3.26432 | 0.22237  |
| C  | 3.13306  | -3.22721 | -0.89622 |
| C  | 2.95435  | -2.75104 | -2.21378 |
| C  | 4.03673  | -2.73950 | -3.11085 |
| C  | 5.30475  | -3.18996 | -2.69374 |
| C  | 5.48709  | -3.64629 | -1.37491 |
| C  | 4.40423  | -3.66670 | -0.47508 |
| C  | 2.22711  | -3.55877 | 1.97190  |
| C  | 2.19185  | -2.48384 | 2.88659  |
| C  | 2.63553  | -2.66823 | 4.20937  |
| C  | 3.11038  | -3.92507 | 4.62946  |
| C  | 3.14465  | -5.00040 | 3.72025  |
| C  | 2.70854  | -4.81804 | 2.39529  |
| C  | -3.13281 | -3.22668 | 0.89653  |
| C  | -2.95340 | -2.75099 | 2.21417  |
| C  | -4.03547 | -2.73913 | 3.11162  |
| C  | -5.30387 | -3.18879 | 2.69479  |
| C  | -5.48690 | -3.64463 | 1.37590  |
| C  | -4.40435 | -3.66536 | 0.47569  |
| C  | -2.22784 | -3.55887 | -1.97184 |
| C  | -2.70994 | -4.81805 | -2.39473 |
| C  | -3.14645 | -5.00062 | -3.71952 |
| C  | -3.11193 | -3.92558 | -4.62907 |
| C  | -2.63641 | -2.66883 | -4.20948 |
| C  | -2.19233 | -2.48423 | -2.88686 |
| C  | -0.71862 | -4.86152 | 0.27583  |
| C  | 0.71839  | -4.86157 | -0.27602 |
| S  | 4.48180  | 4.17193  | 1.04472  |
| S  | 4.93234  | 1.39907  | -0.15507 |
| S  | 7.68669  | 4.94399  | 0.49174  |
| S  | 8.14889  | 2.17844  | -0.71003 |
| C  | 1.39005  | -0.07940 | 0.18729  |
| C  | 2.24796  | 0.80827  | 0.31392  |
| C  | 3.22843  | 1.80863  | 0.44468  |
| C  | 3.04742  | 3.05891  | 0.97733  |
| C  | 1.75396  | 3.59809  | 1.52721  |
| C  | 5.65785  | 3.00964  | 0.27944  |
| C  | 6.96519  | 3.32982  | 0.05548  |
| C  | 9.37909  | 4.55622  | -0.11689 |
| C  | 10.37170 | 5.67903  | 0.05259  |

|   |           |          |          |
|---|-----------|----------|----------|
| C | 9.58439   | 3.32835  | -0.65052 |
| C | 10.86044  | 2.75893  | -1.21825 |
| S | -4.93174  | 1.39941  | 0.15563  |
| S | -4.48242  | 4.17120  | -1.04709 |
| S | -8.14790  | 2.17900  | 0.71247  |
| S | -7.68691  | 4.94351  | -0.49216 |
| C | -1.38987  | -0.07935 | -0.18836 |
| C | -2.24776  | 0.80830  | -0.31518 |
| C | -3.22838  | 1.80852  | -0.44600 |
| C | -3.04791  | 3.05833  | -0.97994 |
| C | -1.75495  | 3.59711  | -1.53140 |
| C | -5.65774  | 3.00952  | -0.27976 |
| C | -6.96492  | 3.32980  | -0.05503 |
| C | -9.58357  | 3.32871  | 0.65302  |
| C | -10.85913 | 2.75966  | 1.22224  |
| C | -9.37881  | 4.55612  | 0.11813  |
| C | -10.37166 | 5.67866  | -0.05161 |
| H | 1.98485   | -2.37392 | -2.53249 |
| H | 3.89396   | -2.37168 | -4.12353 |
| H | 6.14242   | -3.17659 | -3.38643 |
| H | 6.46651   | -3.98291 | -1.04486 |
| H | 4.56274   | -4.00667 | 0.54412  |
| H | 1.82344   | -1.51309 | 2.56690  |
| H | 2.60694   | -1.83513 | 4.90666  |
| H | 3.44900   | -4.06679 | 5.65259  |
| H | 3.51051   | -5.97310 | 4.03855  |
| H | 2.74699   | -5.66089 | 1.70923  |
| H | -1.98360  | -2.37447 | 2.53268  |
| H | -3.89216  | -2.37169 | 4.12436  |
| H | -6.14130  | -3.17518 | 3.38778  |
| H | -6.46661  | -3.98063 | 1.04607  |
| H | -4.56338  | -4.00496 | -0.54355 |
| H | -2.74861  | -5.66067 | -1.70839 |
| H | -3.51283  | -5.97325 | -4.03743 |
| H | -3.45085  | -4.06747 | -5.65207 |
| H | -2.60762  | -1.83595 | -4.90703 |
| H | -1.82343  | -1.51355 | -2.56755 |
| H | -0.72260  | -4.89338 | 1.37173  |
| H | -1.27296  | -5.73632 | -0.08082 |
| H | 0.72237   | -4.89339 | -1.37192 |
| H | 1.27266   | -5.73643 | 0.08060  |
| H | 0.96235   | 2.85467  | 1.39727  |
| H | 1.45590   | 4.52121  | 1.01229  |
| H | 1.84068   | 3.82744  | 2.59789  |
| H | 10.48221  | 5.95160  | 1.11011  |
| H | 10.04976  | 6.57593  | -0.49215 |
| H | 11.35757  | 5.39441  | -0.32431 |
| H | 11.67766  | 3.48236  | -1.15564 |
| H | 10.73486  | 2.48495  | -2.27379 |
| H | 11.16763  | 1.85743  | -0.67246 |
| H | -1.45629  | 4.52045  | -1.01721 |
| H | -1.84272  | 3.82597  | -2.60210 |
| H | -0.96328  | 2.85369  | -1.40189 |
| H | -11.67646 | 3.48295  | 1.15962  |
| H | -10.73270 | 2.48661  | 2.27791  |
| H | -11.16665 | 1.85766  | 0.67746  |
| H | -11.35719 | 5.39433  | 0.32643  |
| H | -10.48311 | 5.95019  | -1.10930 |
| H | -10.04934 | 6.57613  | 0.49197  |

Selection of distances (Å) for the Optimized Geometry of Complex **3<sup>+</sup>**

Pt-P : 2.434

Pt-C≡C-C : 1.977, 1.241, 1.407

TTF Central C-C distance : 1.364

Selection of angles (°) for the Optimized Geometry of Complex **3<sup>+</sup>**

Pt-C≡C : 179.0

C≡C-C : 179.3

Geometry Optimization of Complex 4 : input file.

#B3LYP/LanL2DZ opt

Pt PPh3)2 TTF)2 neutre singulet

```
0 1
Pt 0 0.000000 0.000000 0.000000
P 0 0.600000 -2.220000 0.148000
S 0 -2.497000 -1.024000 4.992000
S 0 -4.509000 1.086000 5.514000
S 0 -3.530000 -2.653000 7.614000
S 0 -5.428000 -0.489000 8.231000
C 0 -0.261000 -3.309000 1.348000
C 0 -0.147000 -3.015000 2.704000
C 0 -0.775000 -3.833000 3.638000
C 0 -1.519000 -4.924000 3.241000
C 0 -1.634000 -5.223000 1.893000
C 0 -0.999000 -4.405000 0.950000
C 0 0.326000 -3.062000 -1.447000
C 0 -0.875000 -2.773000 -2.104000
C 0 -1.193000 -3.424000 -3.288000
C 0 -0.318000 -4.350000 -3.828000
C 0 0.884000 -4.621000 -3.203000
C 0 1.207000 -3.984000 -2.009000
C 0 2.357000 -2.402000 0.618000
C 0 2.910000 -3.653000 0.901000
C 0 4.245000 -3.750000 1.298000
C 0 5.017000 -2.621000 1.424000
C 0 4.472000 -1.371000 1.165000
C 0 3.145000 -1.266000 0.766000
C 0 -1.185000 -0.032000 1.609000
C 0 -1.931000 0.064000 2.570000
C 0 -2.761000 0.169000 3.721000
C 0 -3.695000 1.111000 3.955000
C 0 -4.097000 2.202000 3.011000
C 0 -3.791000 -0.439000 6.041000
C 0 -4.197000 -1.101000 7.128000
C 0 -5.571000 -1.978000 9.167000
C 0 -6.641000 -1.954000 10.235000
C 0 -4.721000 -2.954000 8.887000
C 0 -4.617000 -4.321000 9.536000
P 0 -0.600000 2.220000 -0.148000
S 0 2.497000 1.024000 -4.992000
S 0 4.509000 -1.086000 -5.514000
S 0 3.530000 2.653000 -7.614000
S 0 5.428000 0.489000 -8.231000
C 0 0.261000 3.309000 -1.348000
C 0 0.147000 3.015000 -2.704000
C 0 0.775000 3.833000 -3.638000
C 0 1.519000 4.924000 -3.241000
C 0 1.634000 5.223000 -1.893000
C 0 0.999000 4.405000 -0.950000
C 0 -0.326000 3.062000 1.447000
C 0 0.875000 2.773000 2.104000
C 0 1.193000 3.424000 3.288000
C 0 0.318000 4.350000 3.828000
C 0 -0.884000 4.621000 3.203000
C 0 -1.207000 3.984000 2.009000
C 0 -2.357000 2.402000 -0.618000
C 0 -2.910000 3.653000 -0.901000
C 0 -4.245000 3.750000 -1.298000
C 0 -5.017000 2.621000 -1.424000
```

|     |           |           |            |
|-----|-----------|-----------|------------|
| C 0 | -4.472000 | 1.371000  | -1.165000  |
| C 0 | -3.145000 | 1.266000  | -0.766000  |
| C 0 | 1.185000  | 0.032000  | -1.609000  |
| C 0 | 1.931000  | -0.064000 | -2.570000  |
| C 0 | 2.761000  | -0.169000 | -3.721000  |
| C 0 | 3.695000  | -1.111000 | -3.955000  |
| C 0 | 4.097000  | -2.202000 | -3.011000  |
| C 0 | 3.791000  | 0.439000  | -6.041000  |
| C 0 | 4.197000  | 1.101000  | -7.128000  |
| C 0 | 5.571000  | 1.978000  | -9.167000  |
| C 0 | 6.641000  | 1.954000  | -10.235000 |
| C 0 | 4.721000  | 2.954000  | -8.887000  |
| C 0 | 4.617000  | 4.321000  | -9.536000  |
| H 0 | 0.356000  | -2.261000 | 2.989000   |
| H 0 | -0.691000 | -3.638000 | 4.564000   |
| H 0 | -1.952000 | -5.467000 | 3.889000   |
| H 0 | -2.138000 | -5.977000 | 1.611000   |
| H 0 | -1.077000 | -4.608000 | 0.025000   |
| H 0 | -1.474000 | -2.132000 | -1.738000  |
| H 0 | -2.013000 | -3.233000 | -3.729000  |
| H 0 | -0.545000 | -4.800000 | -4.634000  |
| H 0 | 1.490000  | -5.242000 | -3.589000  |
| H 0 | 2.029000  | -4.179000 | -1.576000  |
| H 0 | 2.379000  | -4.436000 | 0.823000   |
| H 0 | 4.622000  | -4.602000 | 1.483000   |
| H 0 | 5.926000  | -2.695000 | 1.688000   |
| H 0 | 5.005000  | -0.590000 | 1.261000   |
| H 0 | 2.773000  | -0.410000 | 0.590000   |
| H 0 | -3.561000 | 2.141000  | 2.194000   |
| H 0 | -3.949000 | 3.073000  | 3.436000   |
| H 0 | -5.046000 | 2.106000  | 2.787000   |
| H 0 | -6.724000 | -2.845000 | 10.633000  |
| H 0 | -7.497000 | -1.695000 | 9.834000   |
| H 0 | -6.396000 | -1.307000 | 10.929000  |
| H 0 | -5.261000 | -4.382000 | 10.274000  |
| H 0 | -3.710000 | -4.449000 | 9.884000   |
| H 0 | -4.814000 | -5.014000 | 8.872000   |
| H 0 | -0.356000 | 2.261000  | -2.989000  |
| H 0 | 0.691000  | 3.638000  | -4.564000  |
| H 0 | 1.952000  | 5.467000  | -3.889000  |
| H 0 | 2.138000  | 5.977000  | -1.611000  |
| H 0 | 1.077000  | 4.608000  | -0.025000  |
| H 0 | 1.474000  | 2.132000  | 1.738000   |
| H 0 | 2.013000  | 3.233000  | 3.729000   |
| H 0 | 0.545000  | 4.800000  | 4.634000   |
| H 0 | -1.490000 | 5.242000  | 3.589000   |
| H 0 | -2.029000 | 4.179000  | 1.576000   |
| H 0 | -2.379000 | 4.436000  | -0.823000  |
| H 0 | -4.622000 | 4.602000  | -1.483000  |
| H 0 | -5.926000 | 2.695000  | -1.688000  |
| H 0 | -5.005000 | 0.590000  | -1.261000  |
| H 0 | -2.773000 | 0.410000  | -0.590000  |
| H 0 | 3.561000  | -2.141000 | -2.194000  |
| H 0 | 3.949000  | -3.073000 | -3.436000  |
| H 0 | 5.046000  | -2.106000 | -2.787000  |
| H 0 | 6.724000  | 2.845000  | -10.633000 |
| H 0 | 7.497000  | 1.695000  | -9.834000  |
| H 0 | 6.396000  | 1.307000  | -10.929000 |
| H 0 | 5.261000  | 4.382000  | -10.274000 |
| H 0 | 3.710000  | 4.449000  | -9.884000  |
| H 0 | 4.814000  | 5.014000  | -8.872000  |

Cartesians Coordinates for the Optimized Geometry of Complex **4** (-2451.4764955 Hartrees)

|    |         |          |         |
|----|---------|----------|---------|
| Pt | 0.00000 | 0.00000  | 0.00000 |
| P  | 0.33848 | -2.39836 | 0.08242 |

|   |          |          |           |
|---|----------|----------|-----------|
| S | -2.30944 | -0.77278 | 5.10353   |
| S | -5.24568 | 0.13076  | 5.17255   |
| S | -2.61942 | -2.00718 | 8.22221   |
| S | -5.55353 | -1.09361 | 8.29240   |
| C | -1.00178 | -3.45076 | 0.87250   |
| C | -1.23131 | -3.35207 | 2.26194   |
| C | -2.24821 | -4.10911 | 2.86729   |
| C | -3.05060 | -4.96654 | 2.08914   |
| C | -2.82945 | -5.06143 | 0.70281   |
| C | -1.80906 | -4.30549 | 0.09404   |
| C | 0.57352  | -3.18681 | -1.60520  |
| C | -0.14616 | -2.66904 | -2.70193  |
| C | -0.02694 | -3.26490 | -3.97009  |
| C | 0.81824  | -4.37640 | -4.15226  |
| C | 1.54467  | -4.88818 | -3.06059  |
| C | 1.42205  | -4.29675 | -1.78899  |
| C | 1.88818  | -2.80798 | 1.06218   |
| C | 2.04590  | -4.05600 | 1.70310   |
| C | 3.22699  | -4.34243 | 2.41246   |
| C | 4.25842  | -3.38656 | 2.48483   |
| C | 4.10149  | -2.14053 | 1.84812   |
| C | 2.92101  | -1.84942 | 1.13994   |
| C | -1.36231 | -0.07598 | 1.47734   |
| C | -2.18528 | -0.07915 | 2.40687   |
| C | -3.05423 | -0.11624 | 3.52257   |
| C | -4.35207 | 0.28510  | 3.57760   |
| C | -5.14515 | 0.86984  | 2.43913   |
| C | -3.87005 | -0.69899 | 6.06671   |
| C | -3.99633 | -1.18916 | 7.31687   |
| C | -4.93490 | -2.11304 | 9.70076   |
| C | -5.96898 | -2.37989 | 10.76687  |
| C | -3.64511 | -2.51452 | 9.67048   |
| C | -2.89897 | -3.33246 | 10.69573  |
| P | -0.33848 | 2.39836  | -0.08242  |
| S | 2.30944  | 0.77278  | -5.10353  |
| S | 5.24568  | -0.13076 | -5.17255  |
| S | 2.61942  | 2.00718  | -8.22221  |
| S | 5.55353  | 1.09361  | -8.29240  |
| C | 1.00178  | 3.45076  | -0.87250  |
| C | 1.23131  | 3.35207  | -2.26194  |
| C | 2.24821  | 4.10911  | -2.86729  |
| C | 3.05060  | 4.96654  | -2.08914  |
| C | 2.82945  | 5.06143  | -0.70281  |
| C | 1.80906  | 4.30549  | -0.09404  |
| C | -0.57352 | 3.18681  | 1.60520   |
| C | 0.14616  | 2.66904  | 2.70193   |
| C | 0.02694  | 3.26490  | 3.97009   |
| C | -0.81824 | 4.37640  | 4.15226   |
| C | -1.54467 | 4.88818  | 3.06059   |
| C | -1.42205 | 4.29675  | 1.78899   |
| C | -1.88818 | 2.80798  | -1.06218  |
| C | -2.04590 | 4.05600  | -1.70310  |
| C | -3.22699 | 4.34243  | -2.41246  |
| C | -4.25842 | 3.38656  | -2.48483  |
| C | -4.10149 | 2.14053  | -1.84812  |
| C | -2.92101 | 1.84942  | -1.13994  |
| C | 1.36231  | 0.07598  | -1.47734  |
| C | 2.18528  | 0.07915  | -2.40687  |
| C | 3.05423  | 0.11624  | -3.52257  |
| C | 4.35207  | -0.28510 | -3.57760  |
| C | 5.14515  | -0.86984 | -2.43913  |
| C | 3.87005  | 0.69899  | -6.06671  |
| C | 3.99633  | 1.18916  | -7.31687  |
| C | 4.93490  | 2.11304  | -9.70076  |
| C | 5.96898  | 2.37989  | -10.76687 |
| C | 3.64511  | 2.51452  | -9.67048  |
| C | 2.89897  | 3.33246  | -10.69573 |
| H | -0.63282 | -2.68249 | 2.87193   |

|   |          |          |           |
|---|----------|----------|-----------|
| H | -2.42137 | -4.00990 | 3.93523   |
| H | -3.84160 | -5.54726 | 2.55790   |
| H | -3.44536 | -5.71894 | 0.09383   |
| H | -1.64725 | -4.39311 | -0.97606  |
| H | -0.77296 | -1.79084 | -2.57332  |
| H | -0.57511 | -2.85120 | -4.81240  |
| H | 0.92044  | -4.82840 | -5.13596  |
| H | 2.20858  | -5.73852 | -3.19635  |
| H | 1.99928  | -4.69285 | -0.95860  |
| H | 1.24981  | -4.79474 | 1.66843   |
| H | 3.33748  | -5.30434 | 2.90718   |
| H | 5.16932  | -3.60786 | 3.03613   |
| H | 4.89013  | -1.39433 | 1.90636   |
| H | 2.79876  | -0.88452 | 0.65605   |
| H | -4.49889 | 0.99077  | 1.56499   |
| H | -5.55430 | 1.85484  | 2.70368   |
| H | -5.98790 | 0.22054  | 2.16326   |
| H | -5.54677 | -2.95406 | 11.59687  |
| H | -6.81655 | -2.94733 | 10.35969  |
| H | -6.36470 | -1.43953 | 11.17415  |
| H | -3.53245 | -3.56649 | 11.55641  |
| H | -2.01763 | -2.78989 | 11.06393  |
| H | -2.54876 | -4.28030 | 10.26533  |
| H | 0.63282  | 2.68249  | -2.87193  |
| H | 2.42137  | 4.00990  | -3.93523  |
| H | 3.84160  | 5.54726  | -2.55790  |
| H | 3.44536  | 5.71894  | -0.09383  |
| H | 1.64725  | 4.39311  | 0.97606   |
| H | 0.77296  | 1.79084  | 2.57332   |
| H | 0.57511  | 2.85120  | 4.81240   |
| H | -0.92044 | 4.82840  | 5.13596   |
| H | -2.20858 | 5.73852  | 3.19635   |
| H | -1.99928 | 4.69285  | 0.95860   |
| H | -1.24981 | 4.79474  | -1.66843  |
| H | -3.33748 | 5.30434  | -2.90718  |
| H | -5.16932 | 3.60786  | -3.03613  |
| H | -4.89013 | 1.39433  | -1.90636  |
| H | -2.79876 | 0.88452  | -0.65605  |
| H | 4.49889  | -0.99077 | -1.56499  |
| H | 5.55430  | -1.85484 | -2.70368  |
| H | 5.98790  | -0.22054 | -2.16326  |
| H | 5.54677  | 2.95406  | -11.59687 |
| H | 6.81655  | 2.94733  | -10.35969 |
| H | 6.36470  | 1.43953  | -11.17415 |
| H | 3.53245  | 3.56649  | -11.55641 |
| H | 2.01763  | 2.78989  | -11.06393 |
| H | 2.54876  | 4.28030  | -10.26533 |

Selection of distances (Å) for the Optimized Geometry of Complex **4**

Pt-P : 2.424

Pt-C≡C-C : 2.011, 1.242, 1.415

TTF Central C-C distance : 1.349

Selection of angles (°) for the Optimized Geometry of Complex **4**

Pt-C≡C : 177.7

C≡C-C : 176.1

Geometry Optimization of Complex **4**<sup>+</sup> : input file.

#B3LYP/LanL2DZ opt

Pt PPh3)2 TTF)2 cation doublet



|    | 1        | 2        |           |
|----|----------|----------|-----------|
| Pt | 0.00000  | 0.00000  | 0.00000   |
| P  | 0.33848  | -2.39836 | 0.08242   |
| S  | -2.30944 | -0.77278 | 5.10353   |
| S  | -5.24568 | 0.13076  | 5.17255   |
| S  | -2.61942 | -2.00718 | 8.22221   |
| S  | -5.55353 | -1.09361 | 8.29240   |
| C  | -1.00178 | -3.45076 | 0.87250   |
| C  | -1.23131 | -3.35207 | 2.26194   |
| C  | -2.24821 | -4.10911 | 2.86729   |
| C  | -3.05060 | -4.96654 | 2.08914   |
| C  | -2.82945 | -5.06143 | 0.70281   |
| C  | -1.80906 | -4.30549 | 0.09404   |
| C  | 0.57352  | -3.18681 | -1.60520  |
| C  | -0.14616 | -2.66904 | -2.70193  |
| C  | -0.02694 | -3.26490 | -3.97009  |
| C  | 0.81824  | -4.37640 | -4.15226  |
| C  | 1.54467  | -4.88818 | -3.06059  |
| C  | 1.42205  | -4.29675 | -1.78899  |
| C  | 1.88818  | -2.80798 | 1.06218   |
| C  | 2.04590  | -4.05600 | 1.70310   |
| C  | 3.22699  | -4.34243 | 2.41246   |
| C  | 4.25842  | -3.38656 | 2.48483   |
| C  | 4.10149  | -2.14053 | 1.84812   |
| C  | 2.92101  | -1.84942 | 1.13994   |
| C  | -1.36231 | -0.07598 | 1.47734   |
| C  | -2.18528 | -0.07915 | 2.40687   |
| C  | -3.05423 | -0.11624 | 3.52257   |
| C  | -4.35207 | 0.28510  | 3.57760   |
| C  | -5.14515 | 0.86984  | 2.43913   |
| C  | -3.87005 | -0.69899 | 6.06671   |
| C  | -3.99633 | -1.18916 | 7.31687   |
| C  | -4.93490 | -2.11304 | 9.70076   |
| C  | -5.96898 | -2.37989 | 10.76687  |
| C  | -3.64511 | -2.51452 | 9.67048   |
| C  | -2.89897 | -3.33246 | 10.69573  |
| P  | -0.33848 | 2.39836  | -0.08242  |
| S  | 2.30944  | 0.77278  | -5.10353  |
| S  | 5.24568  | -0.13076 | -5.17255  |
| S  | 2.61942  | 2.00718  | -8.22221  |
| S  | 5.55353  | 1.09361  | -8.29240  |
| C  | 1.00178  | 3.45076  | -0.87250  |
| C  | 1.23131  | 3.35207  | -2.26194  |
| C  | 2.24821  | 4.10911  | -2.86729  |
| C  | 3.05060  | 4.96654  | -2.08914  |
| C  | 2.82945  | 5.06143  | -0.70281  |
| C  | 1.80906  | 4.30549  | -0.09404  |
| C  | -0.57352 | 3.18681  | 1.60520   |
| C  | 0.14616  | 2.66904  | 2.70193   |
| C  | 0.02694  | 3.26490  | 3.97009   |
| C  | -0.81824 | 4.37640  | 4.15226   |
| C  | -1.54467 | 4.88818  | 3.06059   |
| C  | -1.42205 | 4.29675  | 1.78899   |
| C  | -1.88818 | 2.80798  | -1.06218  |
| C  | -2.04590 | 4.05600  | -1.70310  |
| C  | -3.22699 | 4.34243  | -2.41246  |
| C  | -4.25842 | 3.38656  | -2.48483  |
| C  | -4.10149 | 2.14053  | -1.84812  |
| C  | -2.92101 | 1.84942  | -1.13994  |
| C  | 1.36231  | 0.07598  | -1.47734  |
| C  | 2.18528  | 0.07915  | -2.40687  |
| C  | 3.05423  | 0.11624  | -3.52257  |
| C  | 4.35207  | -0.28510 | -3.57760  |
| C  | 5.14515  | -0.86984 | -2.43913  |
| C  | 3.87005  | 0.69899  | -6.06671  |
| C  | 3.99633  | 1.18916  | -7.31687  |
| C  | 4.93490  | 2.11304  | -9.70076  |
| C  | 5.96898  | 2.37989  | -10.76687 |

|   |          |          |           |
|---|----------|----------|-----------|
| C | 3.64511  | 2.51452  | -9.67048  |
| C | 2.89897  | 3.33246  | -10.69573 |
| H | -0.63282 | -2.68249 | 2.87193   |
| H | -2.42137 | -4.00990 | 3.93523   |
| H | -3.84160 | -5.54726 | 2.55790   |
| H | -3.44536 | -5.71894 | 0.09383   |
| H | -1.64725 | -4.39311 | -0.97606  |
| H | -0.77296 | -1.79084 | -2.57332  |
| H | -0.57511 | -2.85120 | -4.81240  |
| H | 0.92044  | -4.82840 | -5.13596  |
| H | 2.20858  | -5.73852 | -3.19635  |
| H | 1.99928  | -4.69285 | -0.95860  |
| H | 1.24981  | -4.79474 | 1.66843   |
| H | 3.33748  | -5.30434 | 2.90718   |
| H | 5.16932  | -3.60786 | 3.03613   |
| H | 4.89013  | -1.39433 | 1.90636   |
| H | 2.79876  | -0.88452 | 0.65605   |
| H | -4.49889 | 0.99077  | 1.56499   |
| H | -5.55430 | 1.85484  | 2.70368   |
| H | -5.98790 | 0.22054  | 2.16326   |
| H | -5.54677 | -2.95406 | 11.59687  |
| H | -6.81655 | -2.94733 | 10.35969  |
| H | -6.36470 | -1.43953 | 11.17415  |
| H | -3.53245 | -3.56649 | 11.55641  |
| H | -2.01763 | -2.78989 | 11.06393  |
| H | -2.54876 | -4.28030 | 10.26533  |
| H | 0.63282  | 2.68249  | -2.87193  |
| H | 2.42137  | 4.00990  | -3.93523  |
| H | 3.84160  | 5.54726  | -2.55790  |
| H | 3.44536  | 5.71894  | -0.09383  |
| H | 1.64725  | 4.39311  | 0.97606   |
| H | 0.77296  | 1.79084  | 2.57332   |
| H | 0.57511  | 2.85120  | 4.81240   |
| H | -0.92044 | 4.82840  | 5.13596   |
| H | -2.20858 | 5.73852  | 3.19635   |
| H | -1.99928 | 4.69285  | 0.95860   |
| H | -1.24981 | 4.79474  | -1.66843  |
| H | -3.33748 | 5.30434  | -2.90718  |
| H | -5.16932 | 3.60786  | -3.03613  |
| H | -4.89013 | 1.39433  | -1.90636  |
| H | -2.79876 | 0.88452  | -0.65605  |
| H | 4.49889  | -0.99077 | -1.56499  |
| H | 5.55430  | -1.85484 | -2.70368  |
| H | 5.98790  | -0.22054 | -2.16326  |
| H | 5.54677  | 2.95406  | -11.59687 |
| H | 6.81655  | 2.94733  | -10.35969 |
| H | 6.36470  | 1.43953  | -11.17415 |
| H | 3.53245  | 3.56649  | -11.55641 |
| H | 2.01763  | 2.78989  | -11.06393 |
| H | 2.54876  | 4.28030  | -10.26533 |

Cartesians Coordinates for the Optimized Geometry of Complex  $4^+$  (-2451.2846444 Hartrees)

|    |          |          |          |
|----|----------|----------|----------|
| Pt | 0.00000  | 0.00000  | 0.00000  |
| P  | 0.40055  | -2.40197 | 0.01610  |
| S  | -2.39609 | -1.05183 | 5.04600  |
| S  | -5.27338 | -0.03219 | 5.08211  |
| S  | -2.75751 | -2.15396 | 8.19379  |
| S  | -5.62890 | -1.11870 | 8.22924  |
| C  | -0.92323 | -3.48598 | 0.78873  |
| C  | -1.06799 | -3.51308 | 2.19275  |
| C  | -2.06849 | -4.30246 | 2.78449  |
| C  | -2.94092 | -5.06117 | 1.97964  |
| C  | -2.80474 | -5.02746 | 0.57978  |
| C  | -1.79923 | -4.24254 | -0.01622 |
| C  | 0.61550  | -3.12347 | -1.70297 |
| C  | -0.16136 | -2.59999 | -2.75798 |
| C  | -0.06846 | -3.15525 | -4.04669 |

|   |          |          |           |
|---|----------|----------|-----------|
| C | 0.80764  | -4.23052 | -4.29127  |
| C | 1.59143  | -4.74621 | -3.24182  |
| C | 1.49500  | -4.19684 | -1.94914  |
| C | 1.96168  | -2.80623 | 0.97361   |
| C | 2.18345  | -4.09930 | 1.49741   |
| C | 3.37215  | -4.38452 | 2.19351   |
| C | 4.34643  | -3.38309 | 2.37121   |
| C | 4.12503  | -2.09278 | 1.85338   |
| C | 2.93713  | -1.80328 | 1.15660   |
| C | -1.34092 | -0.15524 | 1.47406   |
| C | -2.16645 | -0.20392 | 2.40348   |
| C | -3.04887 | -0.27139 | 3.49481   |
| C | -4.34087 | 0.18726  | 3.53954   |
| C | -5.07143 | 0.86493  | 2.41167   |
| C | -3.93777 | -0.86825 | 5.99697   |
| C | -4.08710 | -1.31125 | 7.27706   |
| C | -5.01159 | -1.96244 | 9.74461   |
| C | -6.02125 | -2.04495 | 10.86205  |
| C | -3.73834 | -2.42250 | 9.72935   |
| C | -2.99090 | -3.14051 | 10.82505  |
| P | -0.40055 | 2.40197  | -0.01610  |
| S | 2.39609  | 1.05183  | -5.04600  |
| S | 5.27338  | 0.03219  | -5.08211  |
| S | 2.75751  | 2.15396  | -8.19379  |
| S | 5.62890  | 1.11870  | -8.22924  |
| C | 0.92323  | 3.48598  | -0.78873  |
| C | 1.06799  | 3.51308  | -2.19275  |
| C | 2.06849  | 4.30246  | -2.78449  |
| C | 2.94092  | 5.06117  | -1.97964  |
| C | 2.80474  | 5.02746  | -0.57978  |
| C | 1.79923  | 4.24254  | 0.01622   |
| C | -0.61550 | 3.12347  | 1.70297   |
| C | 0.16136  | 2.59999  | 2.75798   |
| C | 0.06846  | 3.15525  | 4.04669   |
| C | -0.80764 | 4.23052  | 4.29127   |
| C | -1.59143 | 4.74621  | 3.24182   |
| C | -1.49500 | 4.19684  | 1.94914   |
| C | -1.96168 | 2.80623  | -0.97361  |
| C | -2.18345 | 4.09930  | -1.49741  |
| C | -3.37215 | 4.38452  | -2.19351  |
| C | -4.34643 | 3.38309  | -2.37121  |
| C | -4.12503 | 2.09278  | -1.85338  |
| C | -2.93713 | 1.80328  | -1.15660  |
| C | 1.34092  | 0.15524  | -1.47406  |
| C | 2.16645  | 0.20392  | -2.40348  |
| C | 3.04887  | 0.27139  | -3.49481  |
| C | 4.34087  | -0.18726 | -3.53954  |
| C | 5.07143  | -0.86493 | -2.41167  |
| C | 3.93777  | 0.86825  | -5.99697  |
| C | 4.08710  | 1.31125  | -7.27706  |
| C | 5.01159  | 1.96244  | -9.74461  |
| C | 6.02125  | 2.04495  | -10.86205 |
| C | 3.73834  | 2.42250  | -9.72935  |
| C | 2.99090  | 3.14051  | -10.82505 |
| H | -0.40674 | -2.92592 | 2.82411   |
| H | -2.17007 | -4.31614 | 3.86612   |
| H | -3.71533 | -5.67079 | 2.43850   |
| H | -3.47186 | -5.61182 | -0.04877  |
| H | -1.69910 | -4.23848 | -1.09732  |
| H | -0.82045 | -1.75400 | -2.58079  |
| H | -0.66831 | -2.74458 | -4.85457  |
| H | 0.88349  | -4.65651 | -5.28857  |
| H | 2.27435  | -5.57183 | -3.42529  |
| H | 2.11197  | -4.60064 | -1.15204  |
| H | 1.43139  | -4.87541 | 1.38378   |
| H | 3.53394  | -5.38115 | 2.59600   |
| H | 5.26267  | -3.60463 | 2.91272   |
| H | 4.86852  | -1.31269 | 1.99663   |

|   |          |          |           |
|---|----------|----------|-----------|
| H | 2.76506  | -0.80403 | 0.76680   |
| H | -4.40341 | 0.97526  | 1.55367   |
| H | -5.42063 | 1.86327  | 2.70697   |
| H | -5.94811 | 0.28269  | 2.09718   |
| H | -5.60387 | -2.55474 | 11.73438  |
| H | -6.91562 | -2.59721 | 10.54587  |
| H | -6.34111 | -1.04391 | 11.17912  |
| H | -3.62017 | -3.27609 | 11.70870  |
| H | -2.10008 | -2.57644 | 11.13060  |
| H | -2.66068 | -4.13317 | 10.49253  |
| H | 0.40674  | 2.92592  | -2.82411  |
| H | 2.17007  | 4.31614  | -3.86612  |
| H | 3.71533  | 5.67079  | -2.43850  |
| H | 3.47186  | 5.61182  | 0.04877   |
| H | 1.69910  | 4.23848  | 1.09732   |
| H | 0.82045  | 1.75400  | 2.58079   |
| H | 0.66831  | 2.74458  | 4.85457   |
| H | -0.88349 | 4.65651  | 5.28857   |
| H | -2.27435 | 5.57183  | 3.42529   |
| H | -2.11197 | 4.60064  | 1.15204   |
| H | -1.43139 | 4.87541  | -1.38378  |
| H | -3.53394 | 5.38115  | -2.59600  |
| H | -5.26267 | 3.60463  | -2.91272  |
| H | -4.86852 | 1.31269  | -1.99663  |
| H | -2.76506 | 0.80403  | -0.76680  |
| H | 4.40341  | -0.97526 | -1.55367  |
| H | 5.42063  | -1.86327 | -2.70697  |
| H | 5.94811  | -0.28269 | -2.09718  |
| H | 5.60387  | 2.55474  | -11.73438 |
| H | 6.91562  | 2.59721  | -10.54587 |
| H | 6.34111  | 1.04391  | -11.17912 |
| H | 3.62017  | 3.27609  | -11.70870 |
| H | 2.10008  | 2.57644  | -11.13060 |
| H | 2.66068  | 4.13317  | -10.49253 |

Selection of distances (Å) for the Optimized Geometry of Complex 4<sup>+</sup>

Pt-P : 2.435

Pt-C≡C-C : 1.999, 1.244, 1.405

TTF Central C-C distance : 1.363

Selection of angles (°) for the Optimized Geometry of Complex 4<sup>+</sup>

Pt-C≡C : 177.7

C≡C-C : 177.3
